# Supplementary material
Source: publisher figshare collection journal article supplement (https://frontiersin.figshare.com/ndownloader/files/15472841)
Supplement: Supplementary file 1 [file 15472841]

Supplementary material to:

**Evidence of continuing presence of a temperate amphipod in the Fram Strait based on sediment trap time series**

Franz Schröter1,2, Angelina Kraft1,3, Charlotte Havermans1,4, Nadine Knüppel1, Agnieszka Beszczynska-Möller5, Eduard Bauerfeind1, Eva-Maria Nöthig1

1Department of Polar Biological Oceanography, Alfred Wegener Institute, Bremerhaven, Germany

2Geo- und Umweltwissenschaften, Eberhard Karls Universität Tübingen, Tübingen, Germany

3Technische Informationsbibliothek (TIB), Hannover, Germany,

4Marine Zoology, Bremen Marine Ecology (BreMarE), University of Bremen, Bremen, Germany

5 Institute of Oceanology, Polish Academy of Sciences, Sopot, Poland

**Table S1:** Appendix 1, I-VI of the Master thesis of Franz Schröter for all data from 2011-2014, 6 Tabs in total. These tables were taken as they are from:

Reference:

Schröter, F. (2016). Community structure of amphipods from sediment traps in the eastern Fram Strait - interactions with environmental parameters in a changing Arctic. Eberhard Karls University Tübingen, Master thesis, hdl:10013/epic.49668

**Table S2:** Monthly counts (specimens per month) of rare amphipod species found in upper sediment traps (~200 m depth) of the northern and central HAUSGARTEN sites between August 2011 and June 2014. Crossed cells indicate months during which no data were obtained (degraded samples). Empty cells = no animal.

|  | **Year** | **2011** | | | | | | **2012** | | | | | | | | | | | | | **2013** | | | | | | | | | | | | | **2014** | | | | | | |
| --- | --- | --- | --- | --- | --- | --- | --- | --- | --- | --- | --- | --- | --- | --- | --- | --- | --- | --- | --- | --- | --- | --- | --- | --- | --- | --- | --- | --- | --- | --- | --- | --- | --- | --- | --- | --- | --- | --- | --- | --- |
|  | Month | | A | S | O | N | D | | J | F | M | A | M | J | J | A | S | O | N | D | | J | F | M | A | M | J | J | A | S | O | N | D | | J | F | M | A | M | J | |
| HAUSGARTEN  NORTH | *Lanceola clausi* | |  |  | 1 | 2 |  | | 3 | 1 | 1 |  |  |  |  |  |  |  |  | 1 | | 1 |  |  |  |  |  |  |  |  |  |  |  | |  |  |  |  |  |  | |
| *Eusirus holmii* | |  |  |  |  |  | |  |  |  |  |  |  |  |  | 1 | 1 | 1 |  | |  |  |  |  |  | 1 |  |  |  |  |  |  | |  |  |  |  |  |  | |
| *Gammarus wilkitzkii* | |  |  |  |  |  | |  |  |  |  | 1 |  |  |  |  |  |  |  | |  |  |  |  |  |  |  |  |  |  |  |  | |  |  |  |  |  |  | |
| *Hyperia medusarum* | |  |  |  |  |  | |  |  | 1 |  |  |  |  |  |  |  |  |  | |  |  | 1 |  |  |  |  |  |  |  |  |  | |  |  | 1 |  |  |  | |
| HAUSGARTEN  CENRAL | *Lanceola clausi* | |  |  | 1 |  |  | | 1 |  |  |  |  |  |  |  |  |  |  |  | | 1 |  |  |  |  |  |  |  |  |  | 1 |  | | 2 |  |  |  | 3 |  | |
| *Eusirus holmii* | |  |  |  |  |  | |  |  |  |  |  |  | 1 |  |  |  | 1 |  | |  |  |  |  |  | 2 |  |  |  | 1 |  |  | |  |  |  |  | 1 |  | |
| *Gammarus wilkitzkii* | |  |  |  |  |  | |  |  |  |  |  |  |  |  |  |  |  |  | |  |  |  |  |  |  |  |  |  |  |  |  | |  |  |  |  |  |  | |
| *Hyperia medusarum* | |  |  |  |  |  | |  |  |  |  |  |  |  |  |  |  |  |  | |  |  |  |  |  |  |  |  |  |  |  |  | |  |  |  |  |  |  | |

| **Table S3**  SIMPER |  |  |  |  |  |  |  |
| --- | --- | --- | --- | --- | --- | --- | --- |
| Similarity Percentages - species contributions | | | |  |  |  |  |
|  |  |  |  |  |  |  |  |
| One-Way Analysis | |  |  |  |  |  |  |
|  |  |  |  |  |  |  |  |
| Data worksheet | |  |  |  |  |  |  |
| Name: Data2 |  |  |  |  |  |  |  |
| Data type: Abundance | |  |  |  |  |  |  |
| Sample selection: All | |  |  |  |  |  |  |
| Variable selection: All | |  |  |  |  |  |  |
|  |  |  |  |  |  |  |  |
| Parameters |  |  |  |  |  |  |  |
| Resemblance: S17 Bray Curtis similarity | | |  |  |  |  |  |
| Cut off for low contributions: 90,00% | | |  |  |  |  |  |
|  |  |  |  |  |  |  |  |
| Factor Groups | |  |  |  |  |  |  |
| Sample | trap |  |  |  |  |  |  |
| Fevi 1 | Fevi 1 |  |  |  |  |  |  |
| Fevi 7 | Fevi 7 |  |  |  |  |  |  |
| Fevi 8 | Fevi 8 |  |  |  |  |  |  |
| Fevi 13 | Fevi 13 |  |  |  |  |  |  |
| Fevi 14 | Fevi 14 |  |  |  |  |  |  |
| Fevi 16 | Fevi 16 |  |  |  |  |  |  |
| Fevi 18 | Fevi 18 |  |  |  |  |  |  |
| Fevi 23 | Fevi 23 |  |  |  |  |  |  |
| Fevi 24 | Fevi 24 |  |  |  |  |  |  |
| Fevi 25 | Fevi 25 |  |  |  |  |  |  |
| Fevi 26 | Fevi 26 |  |  |  |  |  |  |
| Fevi 27 | Fevi 27 |  |  |  |  |  |  |
| Fevi 28 | Fevi 28 |  |  |  |  |  |  |
|  |  |  |  |  |  |  |  |
| Group Fevi 1 |  |  |  |  |  |  |  |
| Less than 2 samples in group | | |  |  |  |  |  |
|  |  |  |  |  |  |  |  |
| Group Fevi 7 |  |  |  |  |  |  |  |
| Less than 2 samples in group | | |  |  |  |  |  |
|  |  |  |  |  |  |  |  |
| Group Fevi 8 |  |  |  |  |  |  |  |
| Less than 2 samples in group | | |  |  |  |  |  |
|  |  |  |  |  |  |  |  |
| Group Fevi 13 | |  |  |  |  |  |  |
| Less than 2 samples in group | | |  |  |  |  |  |
|  |  |  |  |  |  |  |  |
| Group Fevi 14 | |  |  |  |  |  |  |
| Less than 2 samples in group | | |  |  |  |  |  |
|  |  |  |  |  |  |  |  |
| Group Fevi 16 | |  |  |  |  |  |  |
| Less than 2 samples in group | | |  |  |  |  |  |
|  |  |  |  |  |  |  |  |
| Group Fevi 18 | |  |  |  |  |  |  |
| Less than 2 samples in group | | |  |  |  |  |  |
|  |  |  |  |  |  |  |  |
| Group Fevi 23 | |  |  |  |  |  |  |
| Less than 2 samples in group | | |  |  |  |  |  |
|  |  |  |  |  |  |  |  |
| Group Fevi 24 | |  |  |  |  |  |  |
| Less than 2 samples in group | | |  |  |  |  |  |
|  |  |  |  |  |  |  |  |
| Group Fevi 25 | |  |  |  |  |  |  |
| Less than 2 samples in group | | |  |  |  |  |  |
|  |  |  |  |  |  |  |  |
| Group Fevi 26 | |  |  |  |  |  |  |
| Less than 2 samples in group | | |  |  |  |  |  |
|  |  |  |  |  |  |  |  |
| Group Fevi 27 | |  |  |  |  |  |  |
| Less than 2 samples in group | | |  |  |  |  |  |
|  |  |  |  |  |  |  |  |
| Group Fevi 28 | |  |  |  |  |  |  |
| Less than 2 samples in group | | |  |  |  |  |  |
|  |  |  |  |  |  |  |  |
| Groups Fevi 1 & Fevi 7 | |  |  |  |  |  |  |
| Average dissimilarity = 19,20 | | |  |  |  |  |  |
|  |  |  |  |  |  |  |  |
|  | Group Fevi 1 | Group Fevi 7 |  |  |  |  |  |
| Species | Av.Abund | Av.Abund | Av.Diss | Diss/SD | Contrib% | Cum.% |  |
| T. compressa | 0 | 2,69 | 8,1 | Undefined! | 42,19 | 42,19 |  |
| G. wilkitzkii | 1,06 | 0 | 3,2 | Undefined! | 16,67 | 58,85 |  |
| C. guilelmi | 1,06 | 0 | 3,2 | Undefined! | 16,67 | 75,52 |  |
| H. medusarum | 0,75 | 0 | 2,26 | Undefined! | 11,78 | 87,3 |  |
| T. libellula | 6,42 | 5,95 | 1,42 | Undefined! | 7,42 | 94,72 |  |
|  |  |  |  |  |  |  |  |
| Groups Fevi 1 & Fevi 8 | |  |  |  |  |  |  |
| Average dissimilarity = 16,24 | | |  |  |  |  |  |
|  |  |  |  |  |  |  |  |
|  | Group Fevi 1 | Group Fevi 8 |  |  |  |  |  |
| Species | Av.Abund | Av.Abund | Av.Diss | Diss/SD | Contrib% | Cum.% |  |
| T. compressa | 0 | 1,8 | 5,25 | Undefined! | 32,34 | 32,34 |  |
| C. guilelmi | 1,06 | 0,23 | 2,42 | Undefined! | 14,92 | 47,26 |  |
| H. medusarum | 0,75 | 0 | 2,19 | Undefined! | 13,51 | 60,77 |  |
| T. libellula | 6,42 | 5,95 | 1,37 | Undefined! | 8,44 | 69,21 |  |
| L. clausi | 0 | 0,41 | 1,19 | Undefined! | 7,34 | 76,55 |  |
| E. holmii | 0 | 0,4 | 1,15 | Undefined! | 7,1 | 83,65 |  |
| G. wilkitzkii | 1,06 | 0,69 | 1,1 | Undefined! | 6,78 | 90,43 |  |
|  |  |  |  |  |  |  |  |
| Groups Fevi 7 & Fevi 8 | |  |  |  |  |  |  |
| Average dissimilarity = 8,29 | |  |  |  |  |  |  |
|  |  |  |  |  |  |  |  |
|  | Group Fevi 7 | Group Fevi 8 |  |  |  |  |  |
| Species | Av.Abund | Av.Abund | Av.Diss | Diss/SD | Contrib% | Cum.% |  |
| T. compressa | 2,69 | 1,8 | 2,63 | Undefined! | 31,7 | 31,7 |  |
| G. wilkitzkii | 0 | 0,69 | 2,02 | Undefined! | 24,38 | 56,08 |  |
| L. clausi | 0 | 0,41 | 1,2 | Undefined! | 14,5 | 70,58 |  |
| S. borealis | 0 | 0,24 | 0,7 | Undefined! | 8,47 | 79,05 |  |
| C. guilelmi | 0 | 0,23 | 0,69 | Undefined! | 8,28 | 87,33 |  |
| T. abyssorum | 7,57 | 7,77 | 0,6 | Undefined! | 7,21 | 94,55 |  |
|  |  |  |  |  |  |  |  |
| Groups Fevi 1 & Fevi 13 | |  |  |  |  |  |  |
| Average dissimilarity = 25,45 | | |  |  |  |  |  |
|  |  |  |  |  |  |  |  |
|  | Group Fevi 1 | Group Fevi 13 |  |  |  |  |  |
| Species | Av.Abund | Av.Abund | Av.Diss | Diss/SD | Contrib% | Cum.% |  |
| T. compressa | 0 | 2,71 | 8,21 | Undefined! | 32,27 | 32,27 |  |
| T. libellula | 6,42 | 4,81 | 4,88 | Undefined! | 19,16 | 51,43 |  |
| G. wilkitzkii | 1,06 | 0 | 3,22 | Undefined! | 12,67 | 64,1 |  |
| C. guilelmi | 1,06 | 0 | 3,22 | Undefined! | 12,67 | 76,77 |  |
| T. abyssorum | 7,48 | 8,33 | 2,58 | Undefined! | 10,12 | 86,89 |  |
| H. medusarum | 0,75 | 0 | 2,28 | Undefined! | 8,96 | 95,85 |  |
|  |  |  |  |  |  |  |  |
| Groups Fevi 7 & Fevi 13 | |  |  |  |  |  |  |
| Average dissimilarity = 7,67 | |  |  |  |  |  |  |
|  |  |  |  |  |  |  |  |
|  | Group Fevi 7 | Group Fevi 13 |  |  |  |  |  |
| Species | Av.Abund | Av.Abund | Av.Diss | Diss/SD | Contrib% | Cum.% |  |
| T. libellula | 5,95 | 4,81 | 3,48 | Undefined! | 45,32 | 45,32 |  |
| T. abyssorum | 7,57 | 8,33 | 2,32 | Undefined! | 30,28 | 75,6 |  |
| L. clausi | 0 | 0,35 | 1,07 | Undefined! | 13,91 | 89,51 |  |
| E. holmii | 0,25 | 0 | 0,75 | Undefined! | 9,81 | 99,31 |  |
|  |  |  |  |  |  |  |  |
| Groups Fevi 8 & Fevi 13 | |  |  |  |  |  |  |
| Average dissimilarity = 12,52 | | |  |  |  |  |  |
|  |  |  |  |  |  |  |  |
|  | Group Fevi 8 | Group Fevi 13 |  |  |  |  |  |
| Species | Av.Abund | Av.Abund | Av.Diss | Diss/SD | Contrib% | Cum.% |  |
| T. libellula | 5,95 | 4,81 | 3,38 | Undefined! | 27,01 | 27,01 |  |
| T. compressa | 1,8 | 2,71 | 2,7 | Undefined! | 21,57 | 48,58 |  |
| G. wilkitzkii | 0,69 | 0 | 2,04 | Undefined! | 16,28 | 64,86 |  |
| T. abyssorum | 7,77 | 8,33 | 1,65 | Undefined! | 13,17 | 78,02 |  |
| E. holmii | 0,4 | 0 | 1,17 | Undefined! | 9,37 | 87,4 |  |
| S. borealis | 0,24 | 0 | 0,71 | Undefined! | 5,65 | 93,05 |  |
|  |  |  |  |  |  |  |  |
| Groups Fevi 1 & Fevi 14 | |  |  |  |  |  |  |
| Average dissimilarity = 21,94 | | |  |  |  |  |  |
|  |  |  |  |  |  |  |  |
|  | Group Fevi 1 | Group Fevi 14 |  |  |  |  |  |
| Species | Av.Abund | Av.Abund | Av.Diss | Diss/SD | Contrib% | Cum.% |  |
| T. libellula | 6,42 | 4,57 | 5,71 | Undefined! | 26,03 | 26,03 |  |
| T. compressa | 0 | 1,82 | 5,6 | Undefined! | 25,53 | 51,56 |  |
| T. abyssorum | 7,48 | 8,69 | 3,71 | Undefined! | 16,92 | 68,48 |  |
| C. guilelmi | 1,06 | 0 | 3,27 | Undefined! | 14,93 | 83,4 |  |
| H. medusarum | 0,75 | 0 | 2,32 | Undefined! | 10,55 | 93,96 |  |
|  |  |  |  |  |  |  |  |
| Groups Fevi 7 & Fevi 14 | |  |  |  |  |  |  |
| Average dissimilarity = 13,21 | | |  |  |  |  |  |
|  |  |  |  |  |  |  |  |
|  | Group Fevi 7 | Group Fevi 14 |  |  |  |  |  |
| Species | Av.Abund | Av.Abund | Av.Diss | Diss/SD | Contrib% | Cum.% |  |
| T. libellula | 5,95 | 4,57 | 4,3 | Undefined! | 32,53 | 32,53 |  |
| T. abyssorum | 7,57 | 8,69 | 3,46 | Undefined! | 26,24 | 58,76 |  |
| T. compressa | 2,69 | 1,82 | 2,71 | Undefined! | 20,55 | 79,31 |  |
| G. wilkitzkii | 0 | 0,63 | 1,97 | Undefined! | 14,9 | 94,22 |  |
|  |  |  |  |  |  |  |  |
| Groups Fevi 8 & Fevi 14 | |  |  |  |  |  |  |
| Average dissimilarity = 10,98 | | |  |  |  |  |  |
|  |  |  |  |  |  |  |  |
|  | Group Fevi 8 | Group Fevi 14 |  |  |  |  |  |
| Species | Av.Abund | Av.Abund | Av.Diss | Diss/SD | Contrib% | Cum.% |  |
| T. libellula | 5,95 | 4,57 | 4,17 | Undefined! | 38 | 38 |  |
| T. abyssorum | 7,77 | 8,69 | 2,75 | Undefined! | 25 | 63 |  |
| L. clausi | 0,41 | 0 | 1,23 | Undefined! | 11,2 | 74,2 |  |
| E. holmii | 0,4 | 0 | 1,19 | Undefined! | 10,85 | 85,05 |  |
| S. borealis | 0,24 | 0 | 0,72 | Undefined! | 6,54 | 91,59 |  |
|  |  |  |  |  |  |  |  |
| Groups Fevi 13 & Fevi 14 | |  |  |  |  |  |  |
| Average dissimilarity = 7,75 | |  |  |  |  |  |  |
|  |  |  |  |  |  |  |  |
|  | Group Fevi 13 | Group Fevi 14 |  |  |  |  |  |
| Species | Av.Abund | Av.Abund | Av.Diss | Diss/SD | Contrib% | Cum.% |  |
| T. compressa | 2,71 | 1,82 | 2,79 | Undefined! | 35,98 | 35,98 |  |
| G. wilkitzkii | 0 | 0,63 | 1,98 | Undefined! | 25,59 | 61,57 |  |
| T. abyssorum | 8,33 | 8,69 | 1,12 | Undefined! | 14,39 | 75,96 |  |
| L. clausi | 0,35 | 0 | 1,09 | Undefined! | 14,09 | 90,05 |  |
|  |  |  |  |  |  |  |  |
| Groups Fevi 1 & Fevi 16 | |  |  |  |  |  |  |
| Average dissimilarity = 20,43 | | |  |  |  |  |  |
|  |  |  |  |  |  |  |  |
|  | Group Fevi 1 | Group Fevi 16 |  |  |  |  |  |
| Species | Av.Abund | Av.Abund | Av.Diss | Diss/SD | Contrib% | Cum.% |  |
| T. libellula | 6,42 | 4,96 | 4,47 | Undefined! | 21,9 | 21,9 |  |
| T. compressa | 0 | 1,32 | 4,07 | Undefined! | 19,94 | 41,84 |  |
| T. abyssorum | 7,48 | 8,56 | 3,32 | Undefined! | 16,24 | 58,08 |  |
| C. guilelmi | 1,06 | 0 | 3,27 | Undefined! | 16,01 | 74,08 |  |
| H. medusarum | 0,75 | 0 | 2,31 | Undefined! | 11,32 | 85,4 |  |
| G. wilkitzkii | 1,06 | 0,5 | 1,74 | Undefined! | 8,52 | 93,92 |  |
|  |  |  |  |  |  |  |  |
| Groups Fevi 7 & Fevi 16 | |  |  |  |  |  |  |
| Average dissimilarity = 12,89 | | |  |  |  |  |  |
|  |  |  |  |  |  |  |  |
|  | Group Fevi 7 | Group Fevi 16 |  |  |  |  |  |
| Species | Av.Abund | Av.Abund | Av.Diss | Diss/SD | Contrib% | Cum.% |  |
| T. compressa | 2,69 | 1,32 | 4,25 | Undefined! | 32,92 | 32,92 |  |
| T. abyssorum | 7,57 | 8,56 | 3,07 | Undefined! | 23,79 | 56,71 |  |
| T. libellula | 5,95 | 4,96 | 3,05 | Undefined! | 23,64 | 80,35 |  |
| G. wilkitzkii | 0 | 0,5 | 1,55 | Undefined! | 11,98 | 92,34 |  |
|  |  |  |  |  |  |  |  |
| Groups Fevi 8 & Fevi 16 | |  |  |  |  |  |  |
| Average dissimilarity = 9,94 | |  |  |  |  |  |  |
|  |  |  |  |  |  |  |  |
|  | Group Fevi 8 | Group Fevi 16 |  |  |  |  |  |
| Species | Av.Abund | Av.Abund | Av.Diss | Diss/SD | Contrib% | Cum.% |  |
| T. libellula | 5,95 | 4,96 | 2,97 | Undefined! | 29,82 | 29,82 |  |
| T. abyssorum | 7,77 | 8,56 | 2,36 | Undefined! | 23,74 | 53,56 |  |
| T. compressa | 1,8 | 1,32 | 1,43 | Undefined! | 14,37 | 67,93 |  |
| S. borealis | 0,24 | 0 | 0,72 | Undefined! | 7,21 | 75,14 |  |
| C. guilelmi | 0,23 | 0 | 0,7 | Undefined! | 7,05 | 82,2 |  |
| E. holmii | 0,4 | 0,17 | 0,69 | Undefined! | 6,95 | 89,14 |  |
| G. wilkitzkii | 0,69 | 0,5 | 0,57 | Undefined! | 5,71 | 94,86 |  |
|  |  |  |  |  |  |  |  |
| Groups Fevi 13 & Fevi 16 | |  |  |  |  |  |  |
| Average dissimilarity = 7,95 | |  |  |  |  |  |  |
|  |  |  |  |  |  |  |  |
|  | Group Fevi 13 | Group Fevi 16 |  |  |  |  |  |
| Species | Av.Abund | Av.Abund | Av.Diss | Diss/SD | Contrib% | Cum.% |  |
| T. compressa | 2,71 | 1,32 | 4,33 | Undefined! | 54,49 | 54,49 |  |
| G. wilkitzkii | 0 | 0,5 | 1,56 | Undefined! | 19,59 | 74,08 |  |
| T. abyssorum | 8,33 | 8,56 | 0,72 | Undefined! | 9,03 | 83,11 |  |
| E. holmii | 0 | 0,17 | 0,52 | Undefined! | 6,52 | 89,63 |  |
| T. libellula | 4,81 | 4,96 | 0,48 | Undefined! | 6,04 | 95,67 |  |
|  |  |  |  |  |  |  |  |
| Groups Fevi 14 & Fevi 16 | |  |  |  |  |  |  |
| Average dissimilarity = 4,96 | |  |  |  |  |  |  |
|  |  |  |  |  |  |  |  |
|  | Group Fevi 14 | Group Fevi 16 |  |  |  |  |  |
| Species | Av.Abund | Av.Abund | Av.Diss | Diss/SD | Contrib% | Cum.% |  |
| T. compressa | 1,82 | 1,32 | 1,57 | Undefined! | 31,71 | 31,71 |  |
| T. libellula | 4,57 | 4,96 | 1,27 | Undefined! | 25,6 | 57,31 |  |
| L. clausi | 0 | 0,24 | 0,76 | Undefined! | 15,28 | 72,59 |  |
| E. holmii | 0 | 0,17 | 0,53 | Undefined! | 10,62 | 83,21 |  |
| G. wilkitzkii | 0,63 | 0,5 | 0,43 | Undefined! | 8,68 | 91,89 |  |
|  |  |  |  |  |  |  |  |
| Groups Fevi 1 & Fevi 18 | |  |  |  |  |  |  |
| Average dissimilarity = 20,93 | | |  |  |  |  |  |
|  |  |  |  |  |  |  |  |
|  | Group Fevi 1 | Group Fevi 18 |  |  |  |  |  |
| Species | Av.Abund | Av.Abund | Av.Diss | Diss/SD | Contrib% | Cum.% |  |
| T. compressa | 0 | 1,92 | 5,81 | Undefined! | 27,77 | 27,77 |  |
| G. wilkitzkii | 1,06 | 0 | 3,23 | Undefined! | 15,42 | 43,19 |  |
| C. guilelmi | 1,06 | 0 | 3,23 | Undefined! | 15,42 | 58,6 |  |
| T. libellula | 6,42 | 5,55 | 2,64 | Undefined! | 12,62 | 71,22 |  |
| H. medusarum | 0,75 | 0 | 2,28 | Undefined! | 10,9 | 82,12 |  |
| T. abyssorum | 7,48 | 8,09 | 1,84 | Undefined! | 8,78 | 90,9 |  |
|  |  |  |  |  |  |  |  |
| Groups Fevi 7 & Fevi 18 | |  |  |  |  |  |  |
| Average dissimilarity = 6,34 | |  |  |  |  |  |  |
|  |  |  |  |  |  |  |  |
|  | Group Fevi 7 | Group Fevi 18 |  |  |  |  |  |
| Species | Av.Abund | Av.Abund | Av.Diss | Diss/SD | Contrib% | Cum.% |  |
| T. compressa | 2,69 | 1,92 | 2,38 | Undefined! | 37,49 | 37,49 |  |
| T. abyssorum | 7,57 | 8,09 | 1,58 | Undefined! | 24,86 | 62,35 |  |
| T. libellula | 5,95 | 5,55 | 1,22 | Undefined! | 19,2 | 81,55 |  |
| L. clausi | 0 | 0,26 | 0,8 | Undefined! | 12,65 | 94,2 |  |
|  |  |  |  |  |  |  |  |
| Groups Fevi 8 & Fevi 18 | |  |  |  |  |  |  |
| Average dissimilarity = 7,07 | |  |  |  |  |  |  |
|  |  |  |  |  |  |  |  |
|  | Group Fevi 8 | Group Fevi 18 |  |  |  |  |  |
| Species | Av.Abund | Av.Abund | Av.Diss | Diss/SD | Contrib% | Cum.% |  |
| G. wilkitzkii | 0,69 | 0 | 2,04 | Undefined! | 28,85 | 28,85 |  |
| T. libellula | 5,95 | 5,55 | 1,19 | Undefined! | 16,86 | 45,71 |  |
| T. abyssorum | 7,77 | 8,09 | 0,93 | Undefined! | 13,09 | 58,8 |  |
| S. borealis | 0,24 | 0 | 0,71 | Undefined! | 10,02 | 68,82 |  |
| C. guilelmi | 0,23 | 0 | 0,69 | Undefined! | 9,8 | 78,62 |  |
| L. clausi | 0,41 | 0,26 | 0,44 | Undefined! | 6,16 | 84,78 |  |
| E. holmii | 0,4 | 0,26 | 0,41 | Undefined! | 5,79 | 90,56 |  |
|  |  |  |  |  |  |  |  |
| Groups Fevi 13 & Fevi 18 | |  |  |  |  |  |  |
| Average dissimilarity = 6,88 | |  |  |  |  |  |  |
|  |  |  |  |  |  |  |  |
|  | Group Fevi 13 | Group Fevi 18 |  |  |  |  |  |
| Species | Av.Abund | Av.Abund | Av.Diss | Diss/SD | Contrib% | Cum.% |  |
| T. compressa | 2,71 | 1,92 | 2,45 | Undefined! | 35,61 | 35,61 |  |
| T. libellula | 4,81 | 5,55 | 2,28 | Undefined! | 33,13 | 68,74 |  |
| E. holmii | 0 | 0,26 | 0,8 | Undefined! | 11,57 | 80,32 |  |
| T. abyssorum | 8,33 | 8,09 | 0,75 | Undefined! | 10,95 | 91,26 |  |
|  |  |  |  |  |  |  |  |
| Groups Fevi 14 & Fevi 18 | |  |  |  |  |  |  |
| Average dissimilarity = 9,22 | |  |  |  |  |  |  |
|  |  |  |  |  |  |  |  |
|  | Group Fevi 14 | Group Fevi 18 |  |  |  |  |  |
| Species | Av.Abund | Av.Abund | Av.Diss | Diss/SD | Contrib% | Cum.% |  |
| T. libellula | 4,57 | 5,55 | 3,09 | Undefined! | 33,46 | 33,46 |  |
| G. wilkitzkii | 0,63 | 0 | 1,99 | Undefined! | 21,52 | 54,98 |  |
| T. abyssorum | 8,69 | 8,09 | 1,88 | Undefined! | 20,39 | 75,37 |  |
| L. clausi | 0 | 0,26 | 0,82 | Undefined! | 8,9 | 84,28 |  |
| E. holmii | 0 | 0,26 | 0,81 | Undefined! | 8,76 | 93,04 |  |
|  |  |  |  |  |  |  |  |
| Groups Fevi 16 & Fevi 18 | |  |  |  |  |  |  |
| Average dissimilarity = 7,42 | |  |  |  |  |  |  |
|  |  |  |  |  |  |  |  |
|  | Group Fevi 16 | Group Fevi 18 |  |  |  |  |  |
| Species | Av.Abund | Av.Abund | Av.Diss | Diss/SD | Contrib% | Cum.% |  |
| T. compressa | 1,32 | 1,92 | 1,85 | Undefined! | 24,95 | 24,95 |  |
| T. libellula | 4,96 | 5,55 | 1,83 | Undefined! | 24,66 | 49,61 |  |
| G. wilkitzkii | 0,5 | 0 | 1,56 | Undefined! | 20,99 | 70,6 |  |
| T. abyssorum | 8,56 | 8,09 | 1,48 | Undefined! | 19,96 | 90,57 |  |
|  |  |  |  |  |  |  |  |
| Groups Fevi 1 & Fevi 23 | |  |  |  |  |  |  |
| Average dissimilarity = 22,78 | | |  |  |  |  |  |
|  |  |  |  |  |  |  |  |
|  | Group Fevi 1 | Group Fevi 23 |  |  |  |  |  |
| Species | Av.Abund | Av.Abund | Av.Diss | Diss/SD | Contrib% | Cum.% |  |
| T. compressa | 0 | 3,86 | 11,12 | Undefined! | 48,82 | 48,82 |  |
| C. guilelmi | 1,06 | 0 | 3,07 | Undefined! | 13,47 | 62,29 |  |
| T. libellula | 6,42 | 5,4 | 2,93 | Undefined! | 12,86 | 75,15 |  |
| G. wilkitzkii | 1,06 | 0,34 | 2,09 | Undefined! | 9,19 | 84,34 |  |
| L. clausi | 0 | 0,64 | 1,85 | Undefined! | 8,13 | 92,48 |  |
|  |  |  |  |  |  |  |  |
| Groups Fevi 7 & Fevi 23 | |  |  |  |  |  |  |
| Average dissimilarity = 9,49 | |  |  |  |  |  |  |
|  |  |  |  |  |  |  |  |
|  | Group Fevi 7 | Group Fevi 23 |  |  |  |  |  |
| Species | Av.Abund | Av.Abund | Av.Diss | Diss/SD | Contrib% | Cum.% |  |
| T. compressa | 2,69 | 3,86 | 3,39 | Undefined! | 35,69 | 35,69 |  |
| L. clausi | 0 | 0,64 | 1,87 | Undefined! | 19,7 | 55,39 |  |
| T. libellula | 5,95 | 5,4 | 1,58 | Undefined! | 16,63 | 72,02 |  |
| G. wilkitzkii | 0 | 0,34 | 0,98 | Undefined! | 10,35 | 82,37 |  |
| E. holmii | 0,25 | 0 | 0,72 | Undefined! | 7,54 | 89,91 |  |
| H. medusarum | 0 | 0,2 | 0,58 | Undefined! | 6,07 | 95,98 |  |
|  |  |  |  |  |  |  |  |
| Groups Fevi 8 & Fevi 23 | |  |  |  |  |  |  |
| Average dissimilarity = 12,96 | | |  |  |  |  |  |
|  |  |  |  |  |  |  |  |
|  | Group Fevi 8 | Group Fevi 23 |  |  |  |  |  |
| Species | Av.Abund | Av.Abund | Av.Diss | Diss/SD | Contrib% | Cum.% |  |
| T. compressa | 1,8 | 3,86 | 5,81 | Undefined! | 44,85 | 44,85 |  |
| T. libellula | 5,95 | 5,4 | 1,54 | Undefined! | 11,91 | 56,76 |  |
| E. holmii | 0,4 | 0 | 1,12 | Undefined! | 8,63 | 65,38 |  |
| G. wilkitzkii | 0,69 | 0,34 | 0,99 | Undefined! | 7,61 | 73 |  |
| T. abyssorum | 7,77 | 7,44 | 0,95 | Undefined! | 7,29 | 80,29 |  |
| S. borealis | 0,24 | 0 | 0,67 | Undefined! | 5,2 | 85,49 |  |
| L. clausi | 0,41 | 0,64 | 0,66 | Undefined! | 5,11 | 90,6 |  |
|  |  |  |  |  |  |  |  |
| Groups Fevi 13 & Fevi 23 | |  |  |  |  |  |  |
| Average dissimilarity = 10,15 | | |  |  |  |  |  |
|  |  |  |  |  |  |  |  |
|  | Group Fevi 13 | Group Fevi 23 |  |  |  |  |  |
| Species | Av.Abund | Av.Abund | Av.Diss | Diss/SD | Contrib% | Cum.% |  |
| T. compressa | 2,71 | 3,86 | 3,36 | Undefined! | 33,14 | 33,14 |  |
| T. abyssorum | 8,33 | 7,44 | 2,61 | Undefined! | 25,72 | 58,86 |  |
| T. libellula | 4,81 | 5,4 | 1,74 | Undefined! | 17,15 | 76,02 |  |
| G. wilkitzkii | 0 | 0,34 | 0,99 | Undefined! | 9,76 | 85,78 |  |
| L. clausi | 0,35 | 0,64 | 0,86 | Undefined! | 8,5 | 94,28 |  |
|  |  |  |  |  |  |  |  |
| Groups Fevi 14 & Fevi 23 | |  |  |  |  |  |  |
| Average dissimilarity = 15,65 | | |  |  |  |  |  |
|  |  |  |  |  |  |  |  |
|  | Group Fevi 14 | Group Fevi 23 |  |  |  |  |  |
| Species | Av.Abund | Av.Abund | Av.Diss | Diss/SD | Contrib% | Cum.% |  |
| T. compressa | 1,82 | 3,86 | 6,06 | Undefined! | 38,73 | 38,73 |  |
| T. abyssorum | 8,69 | 7,44 | 3,71 | Undefined! | 23,69 | 62,43 |  |
| T. libellula | 4,57 | 5,4 | 2,5 | Undefined! | 15,97 | 78,39 |  |
| L. clausi | 0 | 0,64 | 1,91 | Undefined! | 12,22 | 90,61 |  |
|  |  |  |  |  |  |  |  |
| Groups Fevi 16 & Fevi 23 | |  |  |  |  |  |  |
| Average dissimilarity = 14,92 | | |  |  |  |  |  |
|  |  |  |  |  |  |  |  |
|  | Group Fevi 16 | Group Fevi 23 |  |  |  |  |  |
| Species | Av.Abund | Av.Abund | Av.Diss | Diss/SD | Contrib% | Cum.% |  |
| T. compressa | 1,32 | 3,86 | 7,53 | Undefined! | 50,44 | 50,44 |  |
| T. abyssorum | 8,56 | 7,44 | 3,33 | Undefined! | 22,3 | 72,74 |  |
| T. libellula | 4,96 | 5,4 | 1,31 | Undefined! | 8,77 | 81,51 |  |
| L. clausi | 0,24 | 0,64 | 1,2 | Undefined! | 8,05 | 89,56 |  |
| H. medusarum | 0 | 0,2 | 0,59 | Undefined! | 3,94 | 93,51 |  |
|  |  |  |  |  |  |  |  |
| Groups Fevi 18 & Fevi 23 | |  |  |  |  |  |  |
| Average dissimilarity = 11,78 | | |  |  |  |  |  |
|  |  |  |  |  |  |  |  |
|  | Group Fevi 18 | Group Fevi 23 |  |  |  |  |  |
| Species | Av.Abund | Av.Abund | Av.Diss | Diss/SD | Contrib% | Cum.% |  |
| T. compressa | 1,92 | 3,86 | 5,69 | Undefined! | 48,34 | 48,34 |  |
| T. abyssorum | 8,09 | 7,44 | 1,9 | Undefined! | 16,1 | 64,44 |  |
| L. clausi | 0,26 | 0,64 | 1,12 | Undefined! | 9,49 | 73,93 |  |
| G. wilkitzkii | 0 | 0,34 | 0,99 | Undefined! | 8,41 | 82,34 |  |
| E. holmii | 0,26 | 0 | 0,76 | Undefined! | 6,42 | 88,76 |  |
| H. medusarum | 0 | 0,2 | 0,58 | Undefined! | 4,93 | 93,7 |  |
|  |  |  |  |  |  |  |  |
| Groups Fevi 1 & Fevi 24 | |  |  |  |  |  |  |
| Average dissimilarity = 34,12 | | |  |  |  |  |  |
|  |  |  |  |  |  |  |  |
|  | Group Fevi 1 | Group Fevi 24 |  |  |  |  |  |
| Species | Av.Abund | Av.Abund | Av.Diss | Diss/SD | Contrib% | Cum.% |  |
| T. compressa | 0 | 3,98 | 12,08 | Undefined! | 35,39 | 35,39 |  |
| T. libellula | 6,42 | 3,38 | 9,21 | Undefined! | 27 | 62,39 |  |
| G. wilkitzkii | 1,06 | 0 | 3,22 | Undefined! | 9,45 | 71,84 |  |
| C. guilelmi | 1,06 | 0 | 3,22 | Undefined! | 9,45 | 81,3 |  |
| T. abyssorum | 7,48 | 8,52 | 3,16 | Undefined! | 9,27 | 90,57 |  |
|  |  |  |  |  |  |  |  |
| Groups Fevi 7 & Fevi 24 | |  |  |  |  |  |  |
| Average dissimilarity = 15,47 | | |  |  |  |  |  |
|  |  |  |  |  |  |  |  |
|  | Group Fevi 7 | Group Fevi 24 |  |  |  |  |  |
| Species | Av.Abund | Av.Abund | Av.Diss | Diss/SD | Contrib% | Cum.% |  |
| T. libellula | 5,95 | 3,38 | 7,86 | Undefined! | 50,79 | 50,79 |  |
| T. compressa | 2,69 | 3,98 | 3,95 | Undefined! | 25,55 | 76,33 |  |
| T. abyssorum | 7,57 | 8,52 | 2,92 | Undefined! | 18,85 | 95,19 |  |
|  |  |  |  |  |  |  |  |
| Groups Fevi 8 & Fevi 24 | |  |  |  |  |  |  |
| Average dissimilarity = 21,24 | | |  |  |  |  |  |
|  |  |  |  |  |  |  |  |
|  | Group Fevi 8 | Group Fevi 24 |  |  |  |  |  |
| Species | Av.Abund | Av.Abund | Av.Diss | Diss/SD | Contrib% | Cum.% |  |
| T. libellula | 5,95 | 3,38 | 7,63 | Undefined! | 35,91 | 35,91 |  |
| T. compressa | 1,8 | 3,98 | 6,48 | Undefined! | 30,52 | 66,43 |  |
| T. abyssorum | 7,77 | 8,52 | 2,22 | Undefined! | 10,47 | 76,9 |  |
| G. wilkitzkii | 0,69 | 0 | 2,04 | Undefined! | 9,6 | 86,5 |  |
| L. clausi | 0,41 | 0,15 | 0,76 | Undefined! | 3,56 | 90,06 |  |
|  |  |  |  |  |  |  |  |
| Groups Fevi 13 & Fevi 24 | |  |  |  |  |  |  |
| Average dissimilarity = 10,03 | | |  |  |  |  |  |
|  |  |  |  |  |  |  |  |
|  | Group Fevi 13 | Group Fevi 24 |  |  |  |  |  |
| Species | Av.Abund | Av.Abund | Av.Diss | Diss/SD | Contrib% | Cum.% |  |
| T. libellula | 4,81 | 3,38 | 4,41 | Undefined! | 44,02 | 44,02 |  |
| T. compressa | 2,71 | 3,98 | 3,93 | Undefined! | 39,2 | 83,23 |  |
| L. clausi | 0,35 | 0,15 | 0,6 | Undefined! | 6 | 89,23 |  |
| T. abyssorum | 8,33 | 8,52 | 0,6 | Undefined! | 5,97 | 95,2 |  |
|  |  |  |  |  |  |  |  |
| Groups Fevi 14 & Fevi 24 | |  |  |  |  |  |  |
| Average dissimilarity = 13,95 | | |  |  |  |  |  |
|  |  |  |  |  |  |  |  |
|  | Group Fevi 14 | Group Fevi 24 |  |  |  |  |  |
| Species | Av.Abund | Av.Abund | Av.Diss | Diss/SD | Contrib% | Cum.% |  |
| T. compressa | 1,82 | 3,98 | 6,78 | Undefined! | 48,6 | 48,6 |  |
| T. libellula | 4,57 | 3,38 | 3,71 | Undefined! | 26,6 | 75,19 |  |
| G. wilkitzkii | 0,63 | 0 | 1,98 | Undefined! | 14,22 | 89,41 |  |
| T. abyssorum | 8,69 | 8,52 | 0,51 | Undefined! | 3,64 | 93,05 |  |
|  |  |  |  |  |  |  |  |
| Groups Fevi 16 & Fevi 24 | |  |  |  |  |  |  |
| Average dissimilarity = 15,24 | | |  |  |  |  |  |
|  |  |  |  |  |  |  |  |
|  | Group Fevi 16 | Group Fevi 24 |  |  |  |  |  |
| Species | Av.Abund | Av.Abund | Av.Diss | Diss/SD | Contrib% | Cum.% |  |
| T. compressa | 1,32 | 3,98 | 8,32 | Undefined! | 54,59 | 54,59 |  |
| T. libellula | 4,96 | 3,38 | 4,96 | Undefined! | 32,52 | 87,1 |  |
| G. wilkitzkii | 0,5 | 0 | 1,56 | Undefined! | 10,22 | 97,32 |  |
|  |  |  |  |  |  |  |  |
| Groups Fevi 18 & Fevi 24 | |  |  |  |  |  |  |
| Average dissimilarity = 15,41 | | |  |  |  |  |  |
|  |  |  |  |  |  |  |  |
|  | Group Fevi 18 | Group Fevi 24 |  |  |  |  |  |
| Species | Av.Abund | Av.Abund | Av.Diss | Diss/SD | Contrib% | Cum.% |  |
| T. libellula | 5,55 | 3,38 | 6,7 | Undefined! | 43,44 | 43,44 |  |
| T. compressa | 1,92 | 3,98 | 6,38 | Undefined! | 41,41 | 84,85 |  |
| T. abyssorum | 8,09 | 8,52 | 1,35 | Undefined! | 8,77 | 93,62 |  |
|  |  |  |  |  |  |  |  |
| Groups Fevi 23 & Fevi 24 | |  |  |  |  |  |  |
| Average dissimilarity = 12,95 | | |  |  |  |  |  |
|  |  |  |  |  |  |  |  |
|  | Group Fevi 23 | Group Fevi 24 |  |  |  |  |  |
| Species | Av.Abund | Av.Abund | Av.Diss | Diss/SD | Contrib% | Cum.% |  |
| T. libellula | 5,4 | 3,38 | 5,94 | Undefined! | 45,83 | 45,83 |  |
| T. abyssorum | 7,44 | 8,52 | 3,18 | Undefined! | 24,54 | 70,38 |  |
| L. clausi | 0,64 | 0,15 | 1,44 | Undefined! | 11,08 | 81,46 |  |
| G. wilkitzkii | 0,34 | 0 | 0,99 | Undefined! | 7,65 | 89,1 |  |
| H. medusarum | 0,2 | 0 | 0,58 | Undefined! | 4,48 | 93,59 |  |
|  |  |  |  |  |  |  |  |
| Groups Fevi 1 & Fevi 25 | |  |  |  |  |  |  |
| Average dissimilarity = 27,66 | | |  |  |  |  |  |
|  |  |  |  |  |  |  |  |
|  | Group Fevi 1 | Group Fevi 25 |  |  |  |  |  |
| Species | Av.Abund | Av.Abund | Av.Diss | Diss/SD | Contrib% | Cum.% |  |
| T. compressa | 0 | 4,22 | 12,16 | Undefined! | 43,96 | 43,96 |  |
| T. abyssorum | 7,48 | 5,89 | 4,58 | Undefined! | 16,58 | 60,53 |  |
| G. wilkitzkii | 1,06 | 0 | 3,06 | Undefined! | 11,08 | 71,61 |  |
| C. guilelmi | 1,06 | 0 | 3,06 | Undefined! | 11,08 | 82,69 |  |
| H. medusarum | 0,75 | 0,25 | 1,46 | Undefined! | 5,27 | 87,96 |  |
| E. holmii | 0 | 0,46 | 1,32 | Undefined! | 4,78 | 92,74 |  |
|  |  |  |  |  |  |  |  |
| Groups Fevi 7 & Fevi 25 | |  |  |  |  |  |  |
| Average dissimilarity = 14,08 | | |  |  |  |  |  |
|  |  |  |  |  |  |  |  |
|  | Group Fevi 7 | Group Fevi 25 |  |  |  |  |  |
| Species | Av.Abund | Av.Abund | Av.Diss | Diss/SD | Contrib% | Cum.% |  |
| T. abyssorum | 7,57 | 5,89 | 4,89 | Undefined! | 34,76 | 34,76 |  |
| T. compressa | 2,69 | 4,22 | 4,44 | Undefined! | 31,57 | 66,33 |  |
| T. libellula | 5,95 | 6,87 | 2,68 | Undefined! | 19,05 | 85,37 |  |
| L. clausi | 0 | 0,25 | 0,72 | Undefined! | 5,13 | 90,51 |  |
|  |  |  |  |  |  |  |  |
| Groups Fevi 8 & Fevi 25 | |  |  |  |  |  |  |
| Average dissimilarity = 19,35 | | |  |  |  |  |  |
|  |  |  |  |  |  |  |  |
|  | Group Fevi 8 | Group Fevi 25 |  |  |  |  |  |
| Species | Av.Abund | Av.Abund | Av.Diss | Diss/SD | Contrib% | Cum.% |  |
| T. compressa | 1,8 | 4,22 | 6,83 | Undefined! | 35,32 | 35,32 |  |
| T. abyssorum | 7,77 | 5,89 | 5,32 | Undefined! | 27,52 | 62,84 |  |
| T. libellula | 5,95 | 6,87 | 2,59 | Undefined! | 13,4 | 76,24 |  |
| G. wilkitzkii | 0,69 | 0 | 1,94 | Undefined! | 10,02 | 86,26 |  |
| H. medusarum | 0 | 0,25 | 0,69 | Undefined! | 3,59 | 89,85 |  |
| S. borealis | 0,24 | 0 | 0,67 | Undefined! | 3,48 | 93,33 |  |
|  |  |  |  |  |  |  |  |
| Groups Fevi 13 & Fevi 25 | |  |  |  |  |  |  |
| Average dissimilarity = 19,97 | | |  |  |  |  |  |
|  |  |  |  |  |  |  |  |
|  | Group Fevi 13 | Group Fevi 25 |  |  |  |  |  |
| Species | Av.Abund | Av.Abund | Av.Diss | Diss/SD | Contrib% | Cum.% |  |
| T. abyssorum | 8,33 | 5,89 | 7,15 | Undefined! | 35,82 | 35,82 |  |
| T. libellula | 4,81 | 6,87 | 6,03 | Undefined! | 30,19 | 66,01 |  |
| T. compressa | 2,71 | 4,22 | 4,43 | Undefined! | 22,17 | 88,18 |  |
| E. holmii | 0 | 0,46 | 1,35 | Undefined! | 6,74 | 94,92 |  |
|  |  |  |  |  |  |  |  |
| Groups Fevi 14 & Fevi 25 | |  |  |  |  |  |  |
| Average dissimilarity = 27,02 | | |  |  |  |  |  |
|  |  |  |  |  |  |  |  |
|  | Group Fevi 14 | Group Fevi 25 |  |  |  |  |  |
| Species | Av.Abund | Av.Abund | Av.Diss | Diss/SD | Contrib% | Cum.% |  |
| T. abyssorum | 8,69 | 5,89 | 8,32 | Undefined! | 30,78 | 30,78 |  |
| T. compressa | 1,82 | 4,22 | 7,14 | Undefined! | 26,42 | 57,2 |  |
| T. libellula | 4,57 | 6,87 | 6,85 | Undefined! | 25,35 | 82,54 |  |
| G. wilkitzkii | 0,63 | 0 | 1,88 | Undefined! | 6,97 | 89,51 |  |
| E. holmii | 0 | 0,46 | 1,37 | Undefined! | 5,05 | 94,56 |  |
|  |  |  |  |  |  |  |  |
| Groups Fevi 16 & Fevi 25 | |  |  |  |  |  |  |
| Average dissimilarity = 25,29 | | |  |  |  |  |  |
|  |  |  |  |  |  |  |  |
|  | Group Fevi 16 | Group Fevi 25 |  |  |  |  |  |
| Species | Av.Abund | Av.Abund | Av.Diss | Diss/SD | Contrib% | Cum.% |  |
| T. compressa | 1,32 | 4,22 | 8,6 | Undefined! | 34 | 34 |  |
| T. abyssorum | 8,56 | 5,89 | 7,93 | Undefined! | 31,35 | 65,35 |  |
| T. libellula | 4,96 | 6,87 | 5,65 | Undefined! | 22,35 | 87,7 |  |
| G. wilkitzkii | 0,5 | 0 | 1,48 | Undefined! | 5,84 | 93,55 |  |
|  |  |  |  |  |  |  |  |
| Groups Fevi 18 & Fevi 25 | |  |  |  |  |  |  |
| Average dissimilarity = 18,73 | | |  |  |  |  |  |
|  |  |  |  |  |  |  |  |
|  | Group Fevi 18 | Group Fevi 25 |  |  |  |  |  |
| Species | Av.Abund | Av.Abund | Av.Diss | Diss/SD | Contrib% | Cum.% |  |
| T. compressa | 1,92 | 4,22 | 6,75 | Undefined! | 36,06 | 36,06 |  |
| T. abyssorum | 8,09 | 5,89 | 6,44 | Undefined! | 34,39 | 70,45 |  |
| T. libellula | 5,55 | 6,87 | 3,87 | Undefined! | 20,65 | 91,09 |  |
|  |  |  |  |  |  |  |  |
| Groups Fevi 23 & Fevi 25 | |  |  |  |  |  |  |
| Average dissimilarity = 12,90 | | |  |  |  |  |  |
|  |  |  |  |  |  |  |  |
|  | Group Fevi 23 | Group Fevi 25 |  |  |  |  |  |
| Species | Av.Abund | Av.Abund | Av.Diss | Diss/SD | Contrib% | Cum.% |  |
| T. abyssorum | 7,44 | 5,89 | 4,33 | Undefined! | 33,59 | 33,59 |  |
| T. libellula | 5,4 | 6,87 | 4,09 | Undefined! | 31,7 | 65,29 |  |
| E. holmii | 0 | 0,46 | 1,28 | Undefined! | 9,94 | 75,23 |  |
| L. clausi | 0,64 | 0,25 | 1,1 | Undefined! | 8,53 | 83,76 |  |
| T. compressa | 3,86 | 4,22 | 1,02 | Undefined! | 7,9 | 91,65 |  |
|  |  |  |  |  |  |  |  |
| Groups Fevi 24 & Fevi 25 | |  |  |  |  |  |  |
| Average dissimilarity = 20,52 | | |  |  |  |  |  |
|  |  |  |  |  |  |  |  |
|  | Group Fevi 24 | Group Fevi 25 |  |  |  |  |  |
| Species | Av.Abund | Av.Abund | Av.Diss | Diss/SD | Contrib% | Cum.% |  |
| T. libellula | 3,38 | 6,87 | 10,22 | Undefined! | 49,79 | 49,79 |  |
| T. abyssorum | 8,52 | 5,89 | 7,72 | Undefined! | 37,62 | 87,41 |  |
| E. holmii | 0,16 | 0,46 | 0,89 | Undefined! | 4,33 | 91,74 |  |
|  |  |  |  |  |  |  |  |
| Groups Fevi 1 & Fevi 26 | |  |  |  |  |  |  |
| Average dissimilarity = 25,21 | | |  |  |  |  |  |
|  |  |  |  |  |  |  |  |
|  | Group Fevi 1 | Group Fevi 26 |  |  |  |  |  |
| Species | Av.Abund | Av.Abund | Av.Diss | Diss/SD | Contrib% | Cum.% |  |
| T. compressa | 0 | 4,12 | 12 | Undefined! | 47,59 | 47,59 |  |
| T. abyssorum | 7,48 | 6,42 | 3,1 | Undefined! | 12,31 | 59,9 |  |
| G. wilkitzkii | 1,06 | 0 | 3,1 | Undefined! | 12,29 | 72,19 |  |
| C. guilelmi | 1,06 | 0 | 3,1 | Undefined! | 12,29 | 84,48 |  |
| H. medusarum | 0,75 | 0 | 2,19 | Undefined! | 8,69 | 93,17 |  |
|  |  |  |  |  |  |  |  |
| Groups Fevi 7 & Fevi 26 | |  |  |  |  |  |  |
| Average dissimilarity = 10,00 | | |  |  |  |  |  |
|  |  |  |  |  |  |  |  |
|  | Group Fevi 7 | Group Fevi 26 |  |  |  |  |  |
| Species | Av.Abund | Av.Abund | Av.Diss | Diss/SD | Contrib% | Cum.% |  |
| T. compressa | 2,69 | 4,12 | 4,19 | Undefined! | 41,94 | 41,94 |  |
| T. abyssorum | 7,57 | 6,42 | 3,4 | Undefined! | 34 | 75,93 |  |
| T. libellula | 5,95 | 6,46 | 1,5 | Undefined! | 15,02 | 90,95 |  |
|  |  |  |  |  |  |  |  |
| Groups Fevi 8 & Fevi 26 | |  |  |  |  |  |  |
| Average dissimilarity = 16,01 | | |  |  |  |  |  |
|  |  |  |  |  |  |  |  |
|  | Group Fevi 8 | Group Fevi 26 |  |  |  |  |  |
| Species | Av.Abund | Av.Abund | Av.Diss | Diss/SD | Contrib% | Cum.% |  |
| T. compressa | 1,8 | 4,12 | 6,62 | Undefined! | 41,33 | 41,33 |  |
| T. abyssorum | 7,77 | 6,42 | 3,88 | Undefined! | 24,23 | 65,57 |  |
| G. wilkitzkii | 0,69 | 0 | 1,96 | Undefined! | 12,24 | 77,81 |  |
| T. libellula | 5,95 | 6,46 | 1,45 | Undefined! | 9,04 | 86,84 |  |
| L. clausi | 0,41 | 0,15 | 0,74 | Undefined! | 4,61 | 91,45 |  |
|  |  |  |  |  |  |  |  |
| Groups Fevi 13 & Fevi 26 | |  |  |  |  |  |  |
| Average dissimilarity = 16,51 | | |  |  |  |  |  |
|  |  |  |  |  |  |  |  |
|  | Group Fevi 13 | Group Fevi 26 |  |  |  |  |  |
| Species | Av.Abund | Av.Abund | Av.Diss | Diss/SD | Contrib% | Cum.% |  |
| T. abyssorum | 8,33 | 6,42 | 5,67 | Undefined! | 34,36 | 34,36 |  |
| T. libellula | 4,81 | 6,46 | 4,88 | Undefined! | 29,55 | 63,91 |  |
| T. compressa | 2,71 | 4,12 | 4,18 | Undefined! | 25,29 | 89,2 |  |
| E. holmii | 0 | 0,4 | 1,2 | Undefined! | 7,24 | 96,44 |  |
|  |  |  |  |  |  |  |  |
| Groups Fevi 14 & Fevi 26 | |  |  |  |  |  |  |
| Average dissimilarity = 23,00 | | |  |  |  |  |  |
|  |  |  |  |  |  |  |  |
|  | Group Fevi 14 | Group Fevi 26 |  |  |  |  |  |
| Species | Av.Abund | Av.Abund | Av.Diss | Diss/SD | Contrib% | Cum.% |  |
| T. compressa | 1,82 | 4,12 | 6,91 | Undefined! | 30,06 | 30,06 |  |
| T. abyssorum | 8,69 | 6,42 | 6,83 | Undefined! | 29,69 | 59,75 |  |
| T. libellula | 4,57 | 6,46 | 5,69 | Undefined! | 24,74 | 84,49 |  |
| G. wilkitzkii | 0,63 | 0 | 1,9 | Undefined! | 8,28 | 92,77 |  |
|  |  |  |  |  |  |  |  |
| Groups Fevi 16 & Fevi 26 | |  |  |  |  |  |  |
| Average dissimilarity = 21,79 | | |  |  |  |  |  |
|  |  |  |  |  |  |  |  |
|  | Group Fevi 16 | Group Fevi 26 |  |  |  |  |  |
| Species | Av.Abund | Av.Abund | Av.Diss | Diss/SD | Contrib% | Cum.% |  |
| T. compressa | 1,32 | 4,12 | 8,39 | Undefined! | 38,51 | 38,51 |  |
| T. abyssorum | 8,56 | 6,42 | 6,44 | Undefined! | 29,56 | 68,07 |  |
| T. libellula | 4,96 | 6,46 | 4,48 | Undefined! | 20,58 | 88,65 |  |
| G. wilkitzkii | 0,5 | 0 | 1,49 | Undefined! | 6,86 | 95,51 |  |
|  |  |  |  |  |  |  |  |
| Groups Fevi 18 & Fevi 26 | |  |  |  |  |  |  |
| Average dissimilarity = 15,26 | | |  |  |  |  |  |
|  |  |  |  |  |  |  |  |
|  | Group Fevi 18 | Group Fevi 26 |  |  |  |  |  |
| Species | Av.Abund | Av.Abund | Av.Diss | Diss/SD | Contrib% | Cum.% |  |
| T. compressa | 1,92 | 4,12 | 6,53 | Undefined! | 42,79 | 42,79 |  |
| T. abyssorum | 8,09 | 6,42 | 4,95 | Undefined! | 32,46 | 75,25 |  |
| T. libellula | 5,55 | 6,46 | 2,69 | Undefined! | 17,65 | 92,9 |  |
|  |  |  |  |  |  |  |  |
| Groups Fevi 23 & Fevi 26 | |  |  |  |  |  |  |
| Average dissimilarity = 10,65 | | |  |  |  |  |  |
|  |  |  |  |  |  |  |  |
|  | Group Fevi 23 | Group Fevi 26 |  |  |  |  |  |
| Species | Av.Abund | Av.Abund | Av.Diss | Diss/SD | Contrib% | Cum.% |  |
| T. libellula | 5,4 | 6,46 | 2,97 | Undefined! | 27,91 | 27,91 |  |
| T. abyssorum | 7,44 | 6,42 | 2,89 | Undefined! | 27,18 | 55,09 |  |
| L. clausi | 0,64 | 0,15 | 1,39 | Undefined! | 13,06 | 68,15 |  |
| E. holmii | 0 | 0,4 | 1,14 | Undefined! | 10,69 | 78,84 |  |
| G. wilkitzkii | 0,34 | 0 | 0,95 | Undefined! | 8,95 | 87,79 |  |
| T. compressa | 3,86 | 4,12 | 0,74 | Undefined! | 6,97 | 94,75 |  |
|  |  |  |  |  |  |  |  |
| Groups Fevi 24 & Fevi 26 | |  |  |  |  |  |  |
| Average dissimilarity = 16,51 | | |  |  |  |  |  |
|  |  |  |  |  |  |  |  |
|  | Group Fevi 24 | Group Fevi 26 |  |  |  |  |  |
| Species | Av.Abund | Av.Abund | Av.Diss | Diss/SD | Contrib% | Cum.% |  |
| T. libellula | 3,38 | 6,46 | 9,12 | Undefined! | 55,22 | 55,22 |  |
| T. abyssorum | 8,52 | 6,42 | 6,25 | Undefined! | 37,85 | 93,06 |  |
|  |  |  |  |  |  |  |  |
| Groups Fevi 25 & Fevi 26 | |  |  |  |  |  |  |
| Average dissimilarity = 4,06 | |  |  |  |  |  |  |
|  |  |  |  |  |  |  |  |
|  | Group Fevi 25 | Group Fevi 26 |  |  |  |  |  |
| Species | Av.Abund | Av.Abund | Av.Diss | Diss/SD | Contrib% | Cum.% |  |
| T. abyssorum | 5,89 | 6,42 | 1,48 | Undefined! | 36,56 | 36,56 |  |
| T. libellula | 6,87 | 6,46 | 1,16 | Undefined! | 28,56 | 65,12 |  |
| H. medusarum | 0,25 | 0 | 0,69 | Undefined! | 17,08 | 82,2 |  |
| T. compressa | 4,22 | 4,12 | 0,29 | Undefined! | 7,08 | 89,28 |  |
| L. clausi | 0,25 | 0,15 | 0,28 | Undefined! | 6,84 | 96,12 |  |
|  |  |  |  |  |  |  |  |
| Groups Fevi 1 & Fevi 27 | |  |  |  |  |  |  |
| Average dissimilarity = 27,65 | | |  |  |  |  |  |
|  |  |  |  |  |  |  |  |
|  | Group Fevi 1 | Group Fevi 27 |  |  |  |  |  |
| Species | Av.Abund | Av.Abund | Av.Diss | Diss/SD | Contrib% | Cum.% |  |
| T. compressa | 0 | 3,09 | 9,43 | Undefined! | 34,09 | 34,09 |  |
| T. libellula | 6,42 | 4,13 | 6,98 | Undefined! | 25,25 | 59,35 |  |
| T. abyssorum | 7,48 | 8,56 | 3,29 | Undefined! | 11,92 | 71,27 |  |
| G. wilkitzkii | 1,06 | 0 | 3,24 | Undefined! | 11,72 | 82,98 |  |
| C. guilelmi | 1,06 | 0 | 3,24 | Undefined! | 11,72 | 94,7 |  |
|  |  |  |  |  |  |  |  |
| Groups Fevi 7 & Fevi 27 | |  |  |  |  |  |  |
| Average dissimilarity = 11,47 | | |  |  |  |  |  |
|  |  |  |  |  |  |  |  |
|  | Group Fevi 7 | Group Fevi 27 |  |  |  |  |  |
| Species | Av.Abund | Av.Abund | Av.Diss | Diss/SD | Contrib% | Cum.% |  |
| T. libellula | 5,95 | 4,13 | 5,6 | Undefined! | 48,79 | 48,79 |  |
| T. abyssorum | 7,57 | 8,56 | 3,05 | Undefined! | 26,56 | 75,35 |  |
| T. compressa | 2,69 | 3,09 | 1,24 | Undefined! | 10,81 | 86,16 |  |
| H. medusarum | 0 | 0,27 | 0,83 | Undefined! | 7,26 | 93,41 |  |
|  |  |  |  |  |  |  |  |
| Groups Fevi 8 & Fevi 27 | |  |  |  |  |  |  |
| Average dissimilarity = 18,30 | | |  |  |  |  |  |
|  |  |  |  |  |  |  |  |
|  | Group Fevi 8 | Group Fevi 27 |  |  |  |  |  |
| Species | Av.Abund | Av.Abund | Av.Diss | Diss/SD | Contrib% | Cum.% |  |
| T. libellula | 5,95 | 4,13 | 5,43 | Undefined! | 29,7 | 29,7 |  |
| T. compressa | 1,8 | 3,09 | 3,86 | Undefined! | 21,1 | 50,8 |  |
| T. abyssorum | 7,77 | 8,56 | 2,35 | Undefined! | 12,83 | 63,63 |  |
| G. wilkitzkii | 0,69 | 0 | 2,05 | Undefined! | 11,18 | 74,82 |  |
| L. clausi | 0,41 | 0 | 1,22 | Undefined! | 6,65 | 81,47 |  |
| E. holmii | 0,4 | 0 | 1,18 | Undefined! | 6,44 | 87,91 |  |
| H. medusarum | 0 | 0,27 | 0,81 | Undefined! | 4,41 | 92,32 |  |
|  |  |  |  |  |  |  |  |
| Groups Fevi 13 & Fevi 27 | |  |  |  |  |  |  |
| Average dissimilarity = 5,96 | |  |  |  |  |  |  |
|  |  |  |  |  |  |  |  |
|  | Group Fevi 13 | Group Fevi 27 |  |  |  |  |  |
| Species | Av.Abund | Av.Abund | Av.Diss | Diss/SD | Contrib% | Cum.% |  |
| T. libellula | 4,81 | 4,13 | 2,12 | Undefined! | 35,6 | 35,6 |  |
| T. compressa | 2,71 | 3,09 | 1,2 | Undefined! | 20,09 | 55,69 |  |
| L. clausi | 0,35 | 0 | 1,08 | Undefined! | 18,14 | 73,83 |  |
| H. medusarum | 0 | 0,27 | 0,84 | Undefined! | 14,09 | 87,91 |  |
| T. abyssorum | 8,33 | 8,56 | 0,72 | Undefined! | 12,09 | 100 |  |
|  |  |  |  |  |  |  |  |
| Groups Fevi 14 & Fevi 27 | |  |  |  |  |  |  |
| Average dissimilarity = 8,63 | |  |  |  |  |  |  |
|  |  |  |  |  |  |  |  |
|  | Group Fevi 14 | Group Fevi 27 |  |  |  |  |  |
| Species | Av.Abund | Av.Abund | Av.Diss | Diss/SD | Contrib% | Cum.% |  |
| T. compressa | 1,82 | 3,09 | 4,02 | Undefined! | 46,54 | 46,54 |  |
| G. wilkitzkii | 0,63 | 0 | 1,99 | Undefined! | 23,09 | 69,64 |  |
| T. libellula | 4,57 | 4,13 | 1,38 | Undefined! | 15,97 | 85,61 |  |
| H. medusarum | 0 | 0,27 | 0,85 | Undefined! | 9,87 | 95,48 |  |
|  |  |  |  |  |  |  |  |
| Groups Fevi 16 & Fevi 27 | |  |  |  |  |  |  |
| Average dissimilarity = 11,89 | | |  |  |  |  |  |
|  |  |  |  |  |  |  |  |
|  | Group Fevi 16 | Group Fevi 27 |  |  |  |  |  |
| Species | Av.Abund | Av.Abund | Av.Diss | Diss/SD | Contrib% | Cum.% |  |
| T. compressa | 1,32 | 3,09 | 5,57 | Undefined! | 46,8 | 46,8 |  |
| T. libellula | 4,96 | 4,13 | 2,63 | Undefined! | 22,13 | 68,94 |  |
| G. wilkitzkii | 0,5 | 0 | 1,56 | Undefined! | 13,16 | 82,09 |  |
| H. medusarum | 0 | 0,27 | 0,85 | Undefined! | 7,15 | 89,25 |  |
| L. clausi | 0,24 | 0 | 0,75 | Undefined! | 6,3 | 95,55 |  |
|  |  |  |  |  |  |  |  |
| Groups Fevi 18 & Fevi 27 | |  |  |  |  |  |  |
| Average dissimilarity = 12,33 | | |  |  |  |  |  |
|  |  |  |  |  |  |  |  |
|  | Group Fevi 18 | Group Fevi 27 |  |  |  |  |  |
| Species | Av.Abund | Av.Abund | Av.Diss | Diss/SD | Contrib% | Cum.% |  |
| T. libellula | 5,55 | 4,13 | 4,41 | Undefined! | 35,77 | 35,77 |  |
| T. compressa | 1,92 | 3,09 | 3,66 | Undefined! | 29,66 | 65,43 |  |
| T. abyssorum | 8,09 | 8,56 | 1,48 | Undefined! | 11,97 | 77,4 |  |
| H. medusarum | 0 | 0,27 | 0,84 | Undefined! | 6,81 | 84,21 |  |
| L. clausi | 0,26 | 0 | 0,81 | Undefined! | 6,59 | 90,8 |  |
|  |  |  |  |  |  |  |  |
| Groups Fevi 23 & Fevi 27 | |  |  |  |  |  |  |
| Average dissimilarity = 12,41 | | |  |  |  |  |  |
|  |  |  |  |  |  |  |  |
|  | Group Fevi 23 | Group Fevi 27 |  |  |  |  |  |
| Species | Av.Abund | Av.Abund | Av.Diss | Diss/SD | Contrib% | Cum.% |  |
| T. libellula | 5,4 | 4,13 | 3,76 | Undefined! | 30,32 | 30,32 |  |
| T. abyssorum | 7,44 | 8,56 | 3,31 | Undefined! | 26,63 | 56,95 |  |
| T. compressa | 3,86 | 3,09 | 2,24 | Undefined! | 18,05 | 75,01 |  |
| L. clausi | 0,64 | 0 | 1,89 | Undefined! | 15,25 | 90,26 |  |
|  |  |  |  |  |  |  |  |
| Groups Fevi 24 & Fevi 27 | |  |  |  |  |  |  |
| Average dissimilarity = 6,98 | |  |  |  |  |  |  |
|  |  |  |  |  |  |  |  |
|  | Group Fevi 24 | Group Fevi 27 |  |  |  |  |  |
| Species | Av.Abund | Av.Abund | Av.Diss | Diss/SD | Contrib% | Cum.% |  |
| T. compressa | 3,98 | 3,09 | 2,75 | Undefined! | 39,42 | 39,42 |  |
| T. libellula | 3,38 | 4,13 | 2,31 | Undefined! | 33,13 | 72,55 |  |
| H. medusarum | 0 | 0,27 | 0,84 | Undefined! | 12,02 | 84,57 |  |
| E. holmii | 0,16 | 0 | 0,48 | Undefined! | 6,92 | 91,49 |  |
|  |  |  |  |  |  |  |  |
| Groups Fevi 25 & Fevi 27 | |  |  |  |  |  |  |
| Average dissimilarity = 21,40 | | |  |  |  |  |  |
|  |  |  |  |  |  |  |  |
|  | Group Fevi 25 | Group Fevi 27 |  |  |  |  |  |
| Species | Av.Abund | Av.Abund | Av.Diss | Diss/SD | Contrib% | Cum.% |  |
| T. libellula | 6,87 | 4,13 | 8,07 | Undefined! | 37,7 | 37,7 |  |
| T. abyssorum | 5,89 | 8,56 | 7,87 | Undefined! | 36,76 | 74,46 |  |
| T. compressa | 4,22 | 3,09 | 3,31 | Undefined! | 15,47 | 89,93 |  |
| E. holmii | 0,46 | 0 | 1,35 | Undefined! | 6,31 | 96,25 |  |
|  |  |  |  |  |  |  |  |
| Groups Fevi 26 & Fevi 27 | |  |  |  |  |  |  |
| Average dissimilarity = 18,82 | | |  |  |  |  |  |
|  |  |  |  |  |  |  |  |
|  | Group Fevi 26 | Group Fevi 27 |  |  |  |  |  |
| Species | Av.Abund | Av.Abund | Av.Diss | Diss/SD | Contrib% | Cum.% |  |
| T. libellula | 6,46 | 4,13 | 6,93 | Undefined! | 36,85 | 36,85 |  |
| T. abyssorum | 6,42 | 8,56 | 6,39 | Undefined! | 33,95 | 70,79 |  |
| T. compressa | 4,12 | 3,09 | 3,04 | Undefined! | 16,18 | 86,97 |  |
| E. holmii | 0,4 | 0 | 1,2 | Undefined! | 6,38 | 93,35 |  |
|  |  |  |  |  |  |  |  |
| Groups Fevi 1 & Fevi 28 | |  |  |  |  |  |  |
| Average dissimilarity = 32,97 | | |  |  |  |  |  |
|  |  |  |  |  |  |  |  |
|  | Group Fevi 1 | Group Fevi 28 |  |  |  |  |  |
| Species | Av.Abund | Av.Abund | Av.Diss | Diss/SD | Contrib% | Cum.% |  |
| T. compressa | 0 | 4,29 | 12,64 | Undefined! | 38,35 | 38,35 |  |
| T. libellula | 6,42 | 3,89 | 7,45 | Undefined! | 22,6 | 60,95 |  |
| G. wilkitzkii | 1,06 | 0 | 3,13 | Undefined! | 9,51 | 70,45 |  |
| C. guilelmi | 1,06 | 0 | 3,13 | Undefined! | 9,51 | 79,96 |  |
| H. medusarum | 0,75 | 0 | 2,22 | Undefined! | 6,72 | 86,68 |  |
| T. abyssorum | 7,48 | 8,13 | 1,91 | Undefined! | 5,79 | 92,47 |  |
|  |  |  |  |  |  |  |  |
| Groups Fevi 7 & Fevi 28 | |  |  |  |  |  |  |
| Average dissimilarity = 14,30 | | |  |  |  |  |  |
|  |  |  |  |  |  |  |  |
|  | Group Fevi 7 | Group Fevi 28 |  |  |  |  |  |
| Species | Av.Abund | Av.Abund | Av.Diss | Diss/SD | Contrib% | Cum.% |  |
| T. libellula | 5,95 | 3,89 | 6,11 | Undefined! | 42,75 | 42,75 |  |
| T. compressa | 2,69 | 4,29 | 4,76 | Undefined! | 33,26 | 76,01 |  |
| T. abyssorum | 7,57 | 8,13 | 1,66 | Undefined! | 11,59 | 87,59 |  |
| L. clausi | 0 | 0,51 | 1,53 | Undefined! | 10,7 | 98,3 |  |
|  |  |  |  |  |  |  |  |
| Groups Fevi 8 & Fevi 28 | |  |  |  |  |  |  |
| Average dissimilarity = 18,00 | | |  |  |  |  |  |
|  |  |  |  |  |  |  |  |
|  | Group Fevi 8 | Group Fevi 28 |  |  |  |  |  |
| Species | Av.Abund | Av.Abund | Av.Diss | Diss/SD | Contrib% | Cum.% |  |
| T. compressa | 1,8 | 4,29 | 7,19 | Undefined! | 39,95 | 39,95 |  |
| T. libellula | 5,95 | 3,89 | 5,94 | Undefined! | 33,01 | 72,96 |  |
| G. wilkitzkii | 0,69 | 0 | 1,98 | Undefined! | 11,01 | 83,97 |  |
| T. abyssorum | 7,77 | 8,13 | 1,02 | Undefined! | 5,67 | 89,65 |  |
| S. borealis | 0,24 | 0 | 0,69 | Undefined! | 3,82 | 93,47 |  |
|  |  |  |  |  |  |  |  |
| Groups Fevi 13 & Fevi 28 | |  |  |  |  |  |  |
| Average dissimilarity = 9,58 | |  |  |  |  |  |  |
|  |  |  |  |  |  |  |  |
|  | Group Fevi 13 | Group Fevi 28 |  |  |  |  |  |
| Species | Av.Abund | Av.Abund | Av.Diss | Diss/SD | Contrib% | Cum.% |  |
| T. compressa | 2,71 | 4,29 | 4,74 | Undefined! | 49,48 | 49,48 |  |
| T. libellula | 4,81 | 3,89 | 2,76 | Undefined! | 28,77 | 78,25 |  |
| E. holmii | 0 | 0,33 | 0,98 | Undefined! | 10,25 | 88,5 |  |
| T. abyssorum | 8,33 | 8,13 | 0,6 | Undefined! | 6,31 | 94,8 |  |
|  |  |  |  |  |  |  |  |
| Groups Fevi 14 & Fevi 28 | |  |  |  |  |  |  |
| Average dissimilarity = 15,75 | | |  |  |  |  |  |
|  |  |  |  |  |  |  |  |
|  | Group Fevi 14 | Group Fevi 28 |  |  |  |  |  |
| Species | Av.Abund | Av.Abund | Av.Diss | Diss/SD | Contrib% | Cum.% |  |
| T. compressa | 1,82 | 4,29 | 7,52 | Undefined! | 47,74 | 47,74 |  |
| T. libellula | 4,57 | 3,89 | 2,05 | Undefined! | 13 | 60,74 |  |
| G. wilkitzkii | 0,63 | 0 | 1,93 | Undefined! | 12,23 | 72,97 |  |
| T. abyssorum | 8,69 | 8,13 | 1,7 | Undefined! | 10,77 | 83,74 |  |
| L. clausi | 0 | 0,51 | 1,57 | Undefined! | 9,94 | 93,67 |  |
|  |  |  |  |  |  |  |  |
| Groups Fevi 16 & Fevi 28 | |  |  |  |  |  |  |
| Average dissimilarity = 16,42 | | |  |  |  |  |  |
|  |  |  |  |  |  |  |  |
|  | Group Fevi 16 | Group Fevi 28 |  |  |  |  |  |
| Species | Av.Abund | Av.Abund | Av.Diss | Diss/SD | Contrib% | Cum.% |  |
| T. compressa | 1,32 | 4,29 | 9,01 | Undefined! | 54,87 | 54,87 |  |
| T. libellula | 4,96 | 3,89 | 3,26 | Undefined! | 19,84 | 74,72 |  |
| G. wilkitzkii | 0,5 | 0 | 1,51 | Undefined! | 9,21 | 83,92 |  |
| T. abyssorum | 8,56 | 8,13 | 1,31 | Undefined! | 7,97 | 91,9 |  |
|  |  |  |  |  |  |  |  |
| Groups Fevi 18 & Fevi 28 | |  |  |  |  |  |  |
| Average dissimilarity = 13,51 | | |  |  |  |  |  |
|  |  |  |  |  |  |  |  |
|  | Group Fevi 18 | Group Fevi 28 |  |  |  |  |  |
| Species | Av.Abund | Av.Abund | Av.Diss | Diss/SD | Contrib% | Cum.% |  |
| T. compressa | 1,92 | 4,29 | 7,12 | Undefined! | 52,71 | 52,71 |  |
| T. libellula | 5,55 | 3,89 | 4,97 | Undefined! | 36,79 | 89,51 |  |
| L. clausi | 0,26 | 0,51 | 0,76 | Undefined! | 5,61 | 95,11 |  |
|  |  |  |  |  |  |  |  |
| Groups Fevi 23 & Fevi 28 | |  |  |  |  |  |  |
| Average dissimilarity = 10,35 | | |  |  |  |  |  |
|  |  |  |  |  |  |  |  |
|  | Group Fevi 23 | Group Fevi 28 |  |  |  |  |  |
| Species | Av.Abund | Av.Abund | Av.Diss | Diss/SD | Contrib% | Cum.% |  |
| T. libellula | 5,4 | 3,89 | 4,32 | Undefined! | 41,71 | 41,71 |  |
| T. abyssorum | 7,44 | 8,13 | 1,96 | Undefined! | 18,97 | 60,68 |  |
| T. compressa | 3,86 | 4,29 | 1,24 | Undefined! | 11,99 | 72,67 |  |
| G. wilkitzkii | 0,34 | 0 | 0,96 | Undefined! | 9,31 | 81,98 |  |
| E. holmii | 0 | 0,33 | 0,93 | Undefined! | 9,03 | 91,01 |  |
|  |  |  |  |  |  |  |  |
| Groups Fevi 24 & Fevi 28 | |  |  |  |  |  |  |
| Average dissimilarity = 5,24 | |  |  |  |  |  |  |
|  |  |  |  |  |  |  |  |
|  | Group Fevi 24 | Group Fevi 28 |  |  |  |  |  |
| Species | Av.Abund | Av.Abund | Av.Diss | Diss/SD | Contrib% | Cum.% |  |
| T. libellula | 3,38 | 3,89 | 1,53 | Undefined! | 29,25 | 29,25 |  |
| T. abyssorum | 8,52 | 8,13 | 1,19 | Undefined! | 22,64 | 51,89 |  |
| L. clausi | 0,15 | 0,51 | 1,08 | Undefined! | 20,67 | 72,56 |  |
| T. compressa | 3,98 | 4,29 | 0,92 | Undefined! | 17,62 | 90,18 |  |
|  |  |  |  |  |  |  |  |
| Groups Fevi 25 & Fevi 28 | |  |  |  |  |  |  |
| Average dissimilarity = 16,90 | | |  |  |  |  |  |
|  |  |  |  |  |  |  |  |
|  | Group Fevi 25 | Group Fevi 28 |  |  |  |  |  |
| Species | Av.Abund | Av.Abund | Av.Diss | Diss/SD | Contrib% | Cum.% |  |
| T. libellula | 6,87 | 3,89 | 8,48 | Undefined! | 50,19 | 50,19 |  |
| T. abyssorum | 5,89 | 8,13 | 6,38 | Undefined! | 37,77 | 87,96 |  |
| L. clausi | 0,25 | 0,51 | 0,76 | Undefined! | 4,49 | 92,45 |  |
|  |  |  |  |  |  |  |  |
| Groups Fevi 26 & Fevi 28 | |  |  |  |  |  |  |
| Average dissimilarity = 14,09 | | |  |  |  |  |  |
|  |  |  |  |  |  |  |  |
|  | Group Fevi 26 | Group Fevi 28 |  |  |  |  |  |
| Species | Av.Abund | Av.Abund | Av.Diss | Diss/SD | Contrib% | Cum.% |  |
| T. libellula | 6,46 | 3,89 | 7,39 | Undefined! | 52,45 | 52,45 |  |
| T. abyssorum | 6,42 | 8,13 | 4,94 | Undefined! | 35,03 | 87,48 |  |
| L. clausi | 0,15 | 0,51 | 1,05 | Undefined! | 7,45 | 94,93 |  |
|  |  |  |  |  |  |  |  |
| Groups Fevi 27 & Fevi 28 | |  |  |  |  |  |  |
| Average dissimilarity = 8,96 | |  |  |  |  |  |  |
|  |  |  |  |  |  |  |  |
|  | Group Fevi 27 | Group Fevi 28 |  |  |  |  |  |
| Species | Av.Abund | Av.Abund | Av.Diss | Diss/SD | Contrib% | Cum.% |  |
| T. compressa | 3,09 | 4,29 | 3,6 | Undefined! | 40,15 | 40,15 |  |
| L. clausi | 0 | 0,51 | 1,55 | Undefined! | 17,28 | 57,43 |  |
| T. abyssorum | 8,56 | 8,13 | 1,31 | Undefined! | 14,57 | 72,01 |  |
| E. holmii | 0 | 0,33 | 0,99 | Undefined! | 11 | 83,01 |  |
| H. medusarum | 0,27 | 0 | 0,81 | Undefined! | 9,09 | 92,1 |  |
|  |  |  |  |  |  |  |  |

Figure S1: Mean temperature of Atlantic water (TAW) in the West Spitsbergen Current, obtained by moored instruments (blue) and summer CTD-sections (red) located at 78°50’N.


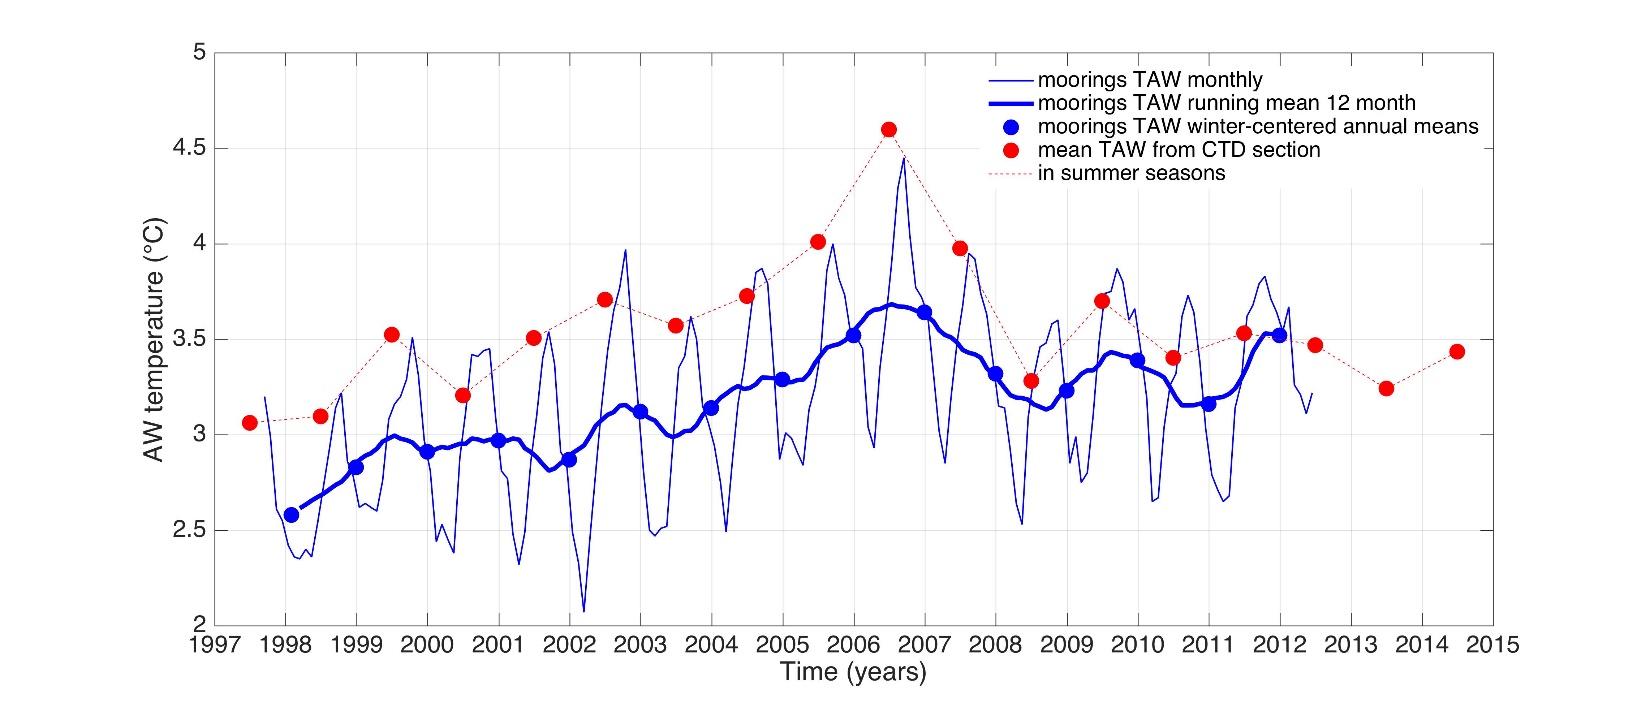
**Water temperatures and salinity data** were recorded by MicroCAT CTD-sensors at a nominal depth of ~170 m at the sediment trap moorings during 2010/11-2014. Prior to this period, data were retrieved from RCMs deployed below traps (2006/07 to 2010/11) and, from an oceanographic mooring located 20 km south of the sediment trap moorings during the years before (Bauerfeind et al., 2015; references cited in original manuscript).

**Additional Information for Figure 2 at Hausgarten central**

Traps details not shown in Tab.1 for the years 2009/10 and 2010/11

**Mooring period Lat. N Long. E Water Trap Number remarks**

***in year*s depth depth of samples**

(m) (m)

*2009-2010*

20.07.2009-15.07.2010 79°00.43’ 04°20.05' 2550 80 15 5 cups degraded

*2010-2011*

10.07.2010-30.06.2011 79°00.41’ 04°19.90' 2567 200 20
